# Supplementary figures and images for: Lanthanide complexes of iminocarboxylate ligands derived from 1,4,7-triazacyclononane: structural characterisation and relaxivity of the GdIII and luminescence of the EuIII complexesElectronic supplementary information (ESI) available: 1H NMR spectra of [Y(L1)(CH3CO2)] (6) in D2O at 298 K and 1H NMR data on acid-catalysed hydrolysis of [La(L)] (5) in D2O (pD = 4.4). See http://www.rsc.org/suppdata/dt/b2/b209090m/
Source: Royal Society of Chemistry journal article supplement (doi:10.1039/b209090m), 2003-03-26

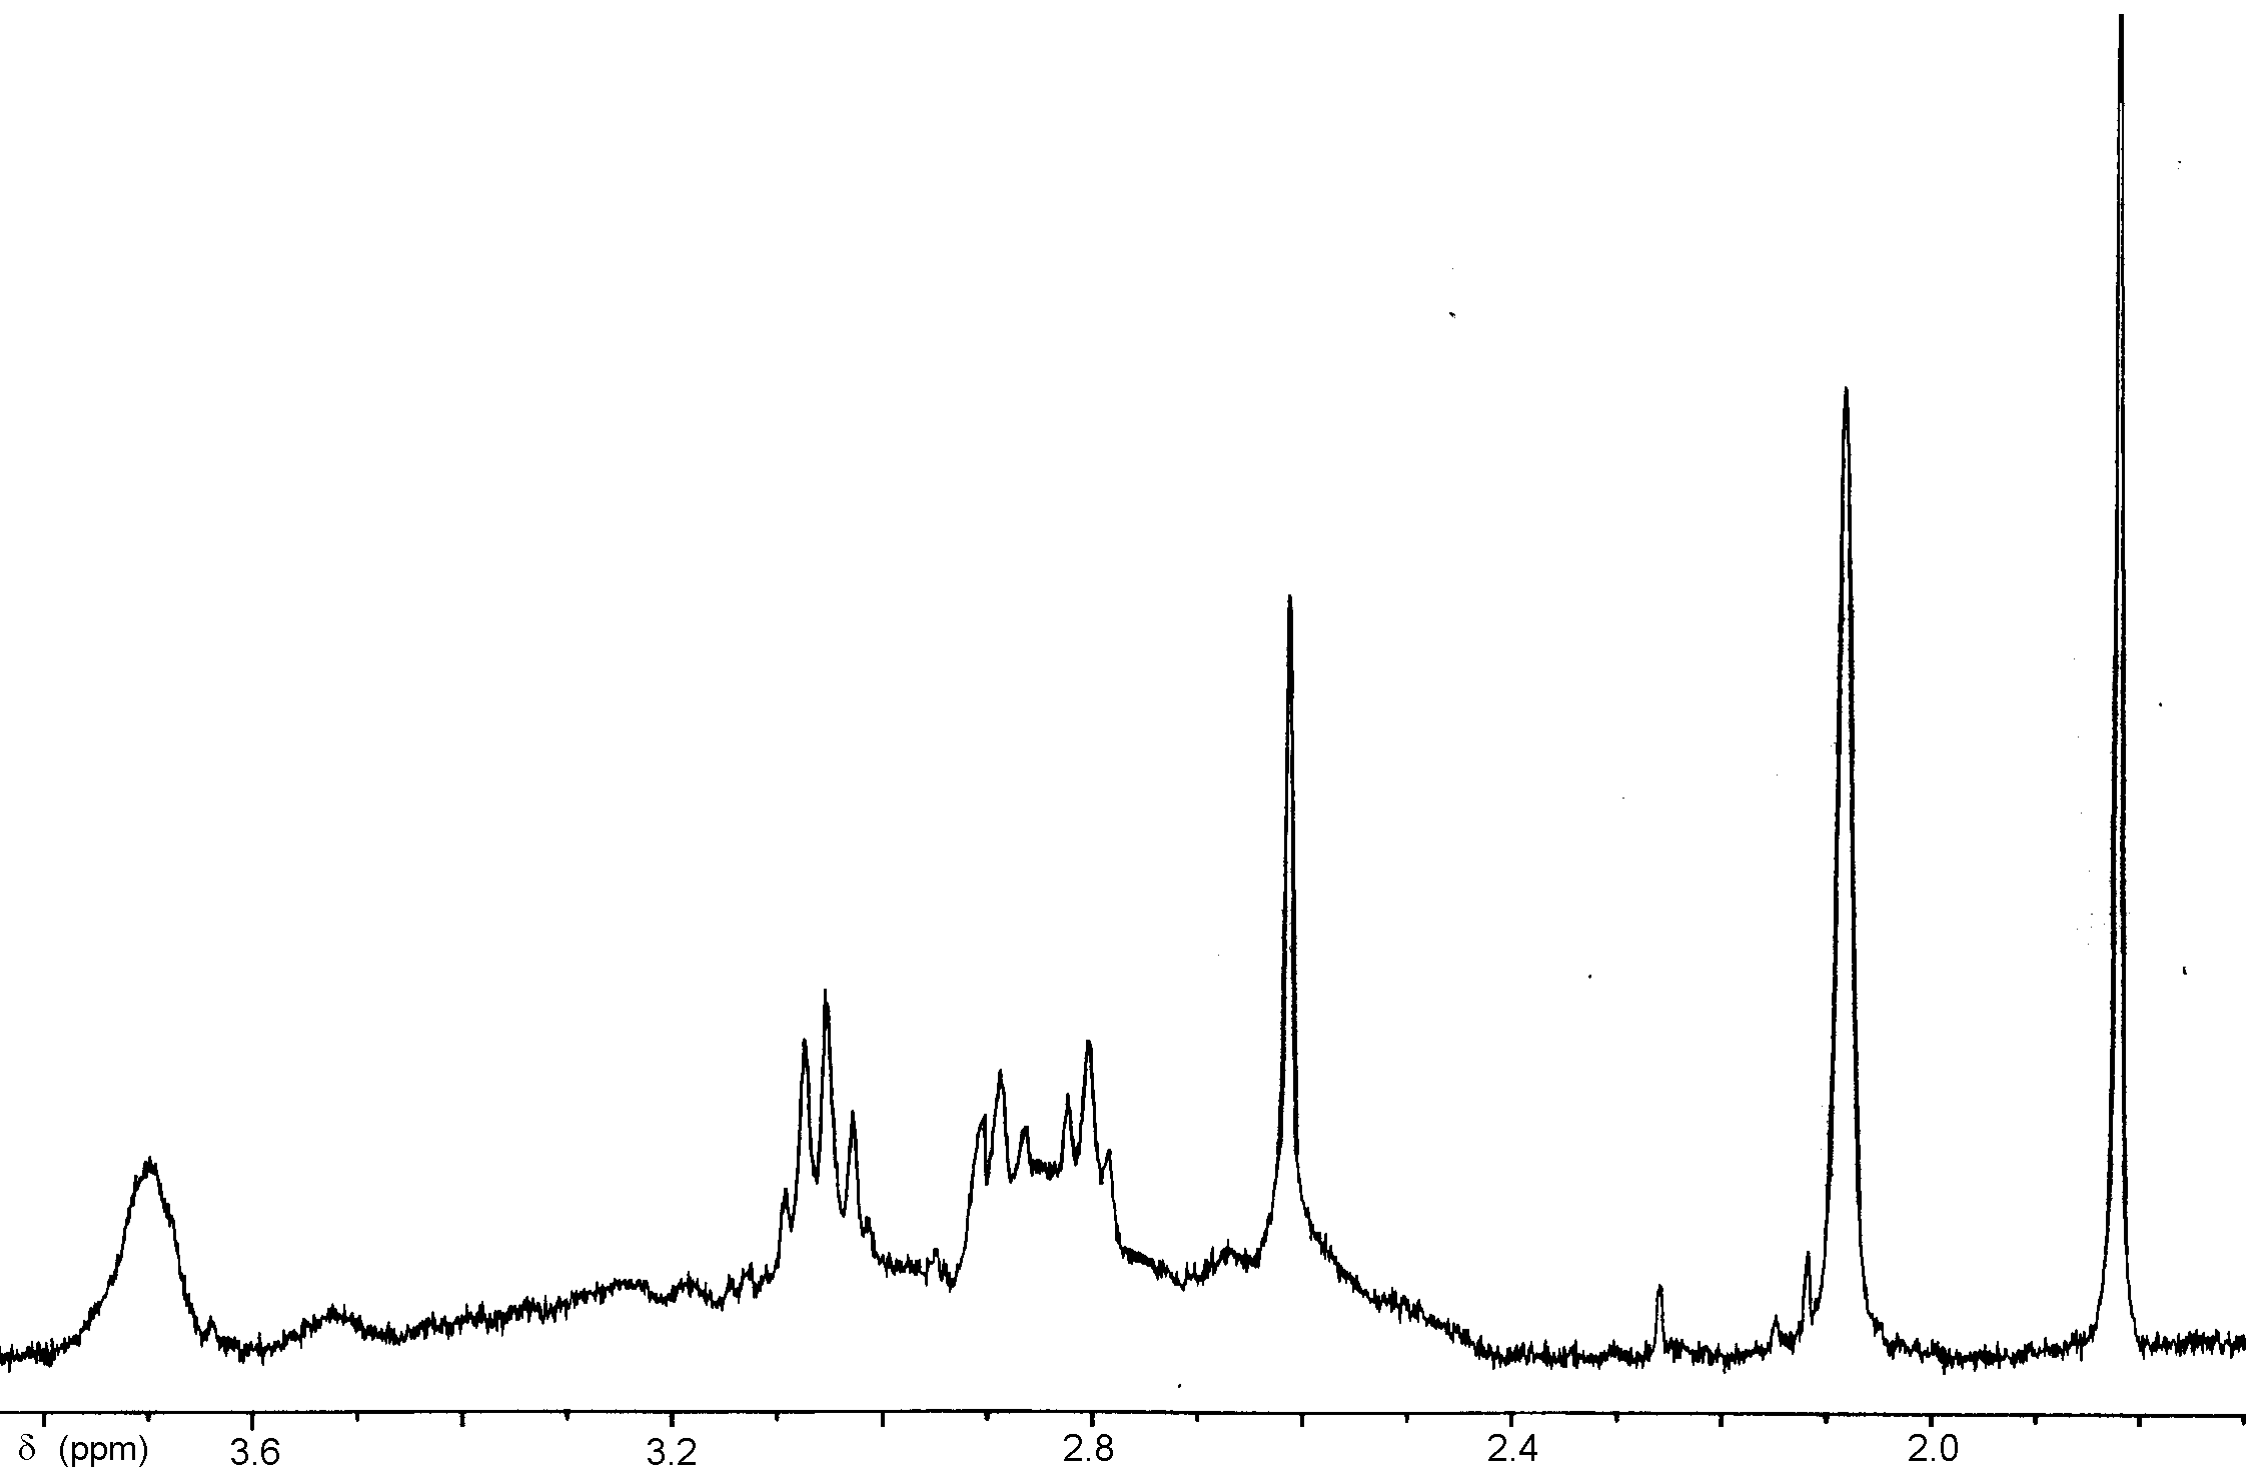

Supplement: b209090m.pdf [file b209090m.pdf]

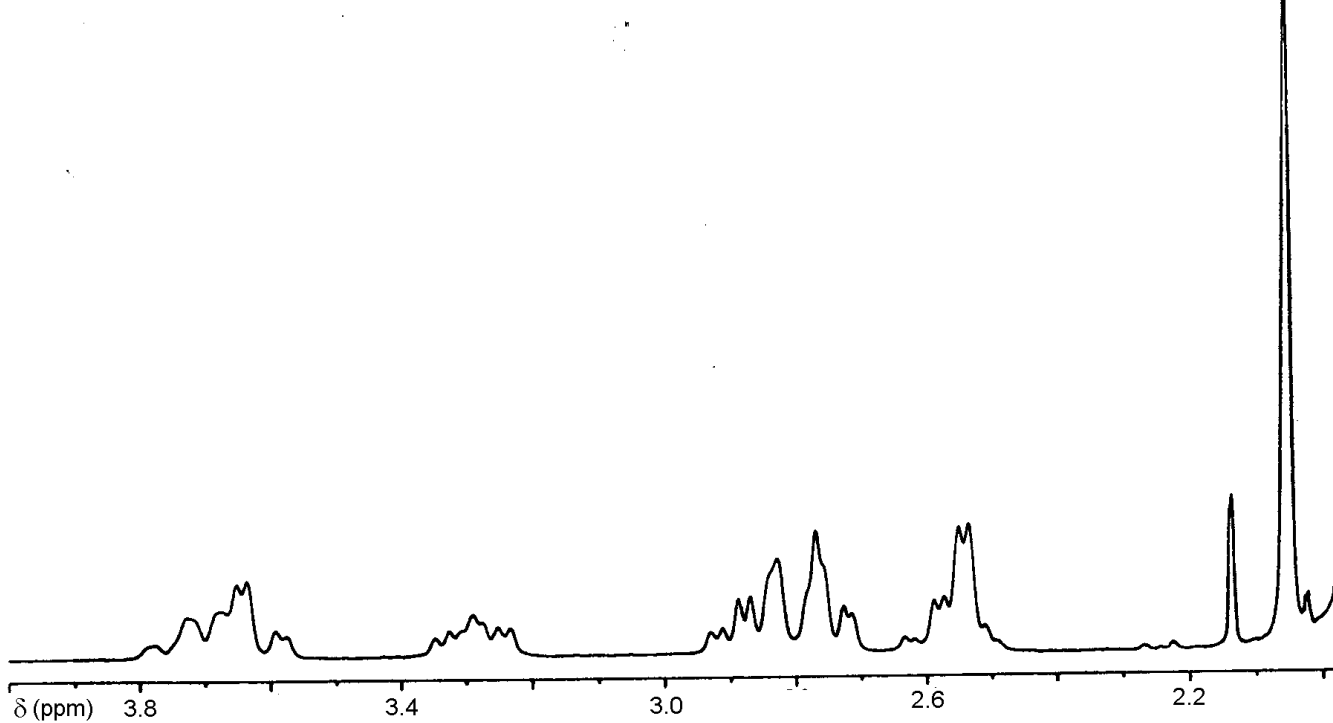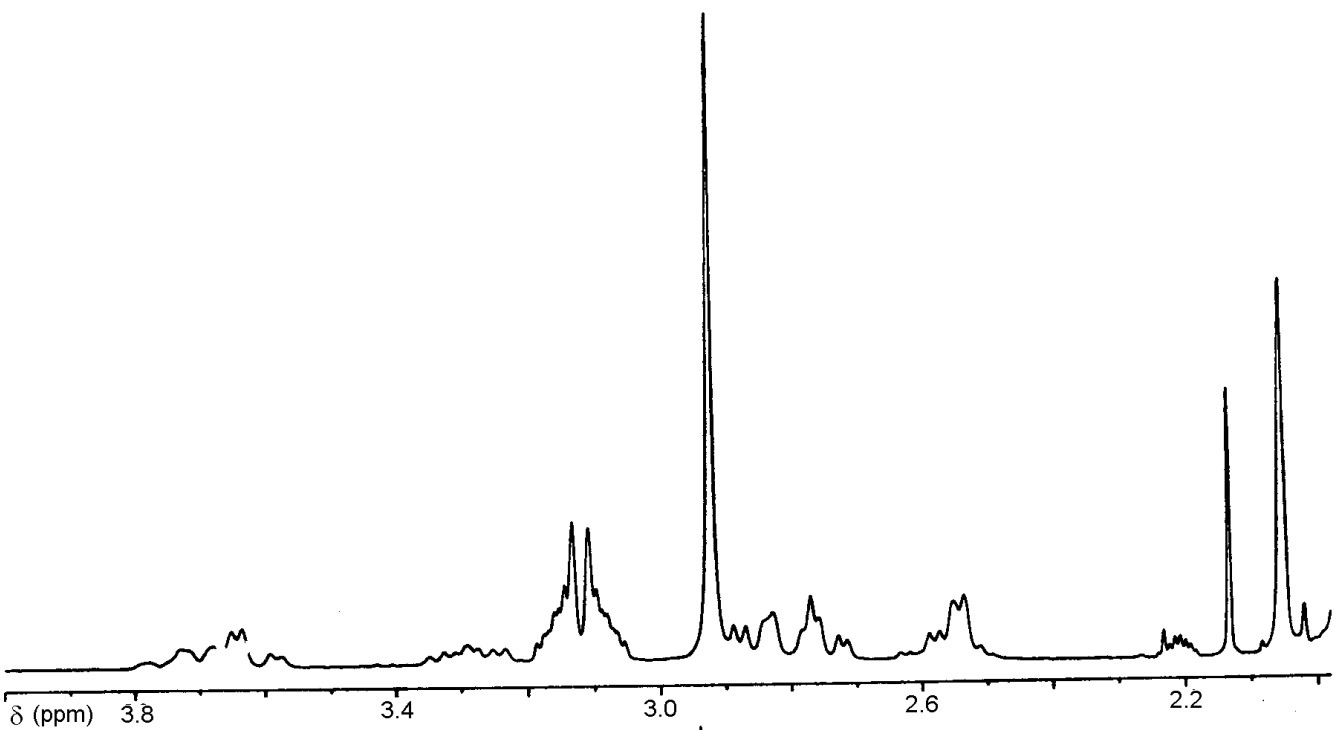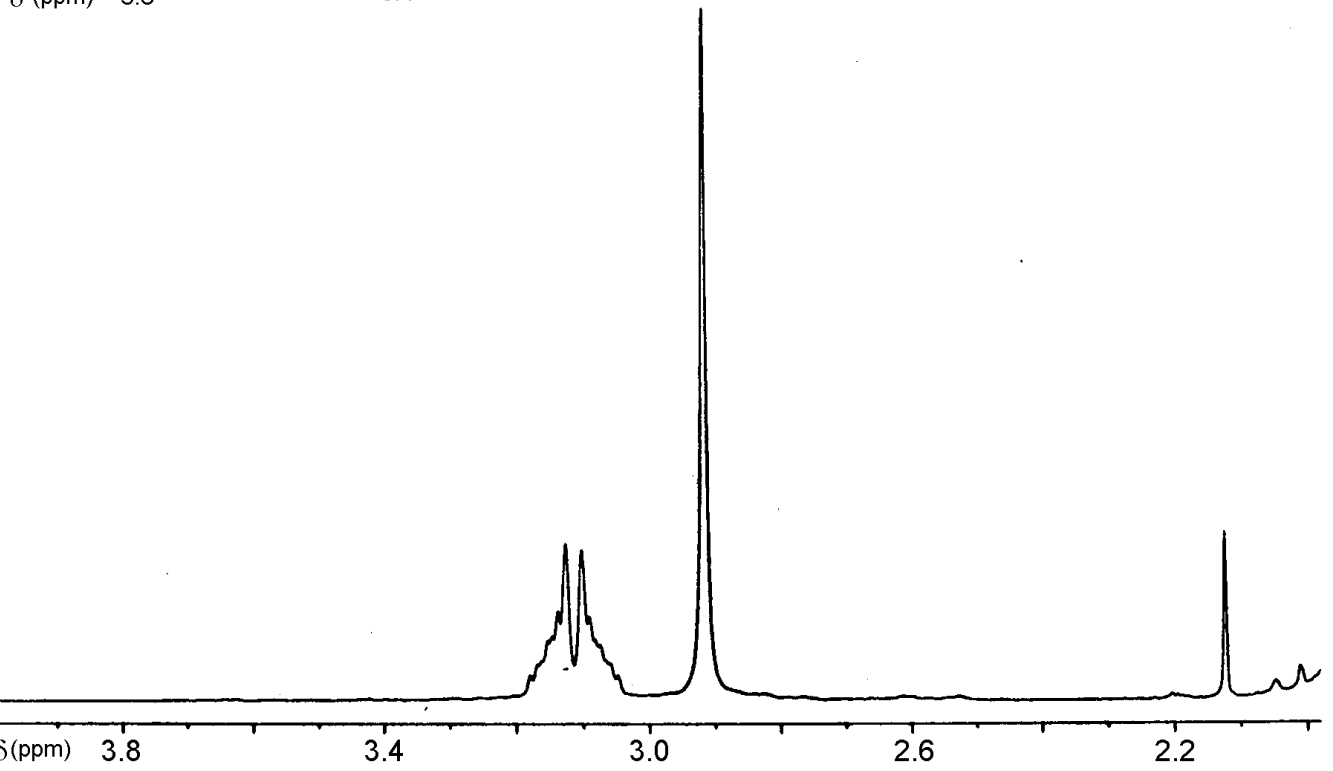

Supplement: b209090m1.pdf [file b209090m1.pdf]
